# Supplementary material for: Nanoporous ultra-high-entropy alloys containing fourteen elements for water splitting electrocatalysis
Source: Royal Society of Chemistry journal article supplement (doi:10.1039/d1sc01981c), 2021-01-01
Supplement: d1sc01981c1.pdf [file d1sc01981c1.pdf]

## Supporting Information

### Nanoporous ultra-high-entropy alloys containing fourteen elements for water splitting electrocatalysis

*Ze-Xing Cai, Hiromi Goou, Yoshikazu Ito, Tomoharu Tokunaga, Masahiro Miyauchi, Hideki Abe, Takeshi Fujita\**

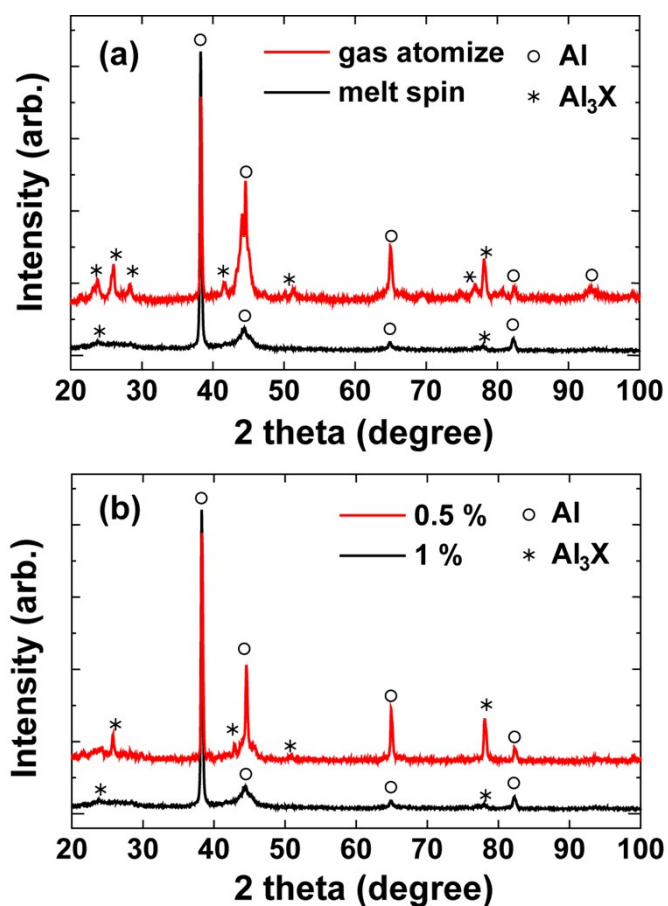

**Figure S1.** (a) XRD patterns of as-made precursor alloy  $\text{Al}_{89}\text{Ag}_1\text{Au}_1\text{Co}_1\text{Cu}_1\text{Fe}_1\text{Ir}_1\text{Ni}_1\text{Pd}_1\text{Pt}_1\text{Rh}_1\text{Ru}_1$  quenched via gas atomization for powder form or melt spinning for ribbon form. (b) XRD patterns of as-made precursor alloys  $\text{Al}_{89}\text{Ag}_1\text{Au}_1\text{Co}_1\text{Cu}_1\text{Fe}_1\text{Ir}_1\text{Ni}_1\text{Pd}_1\text{Pt}_1\text{Rh}_1\text{Ru}_1$  (denoted as 1%) and  $\text{Al}_{94.5}\text{Ag}_{0.5}\text{Au}_{0.5}\text{Co}_{0.5}\text{Cu}_{0.5}\text{Fe}_{0.5}\text{Ir}_{0.5}\text{Ni}_{0.5}\text{Pd}_{0.5}\text{Pt}_{0.5}\text{Rh}_{0.5}\text{Ru}_{0.5}$  (denoted as 0.5%), quenched using the melt spinning technique.

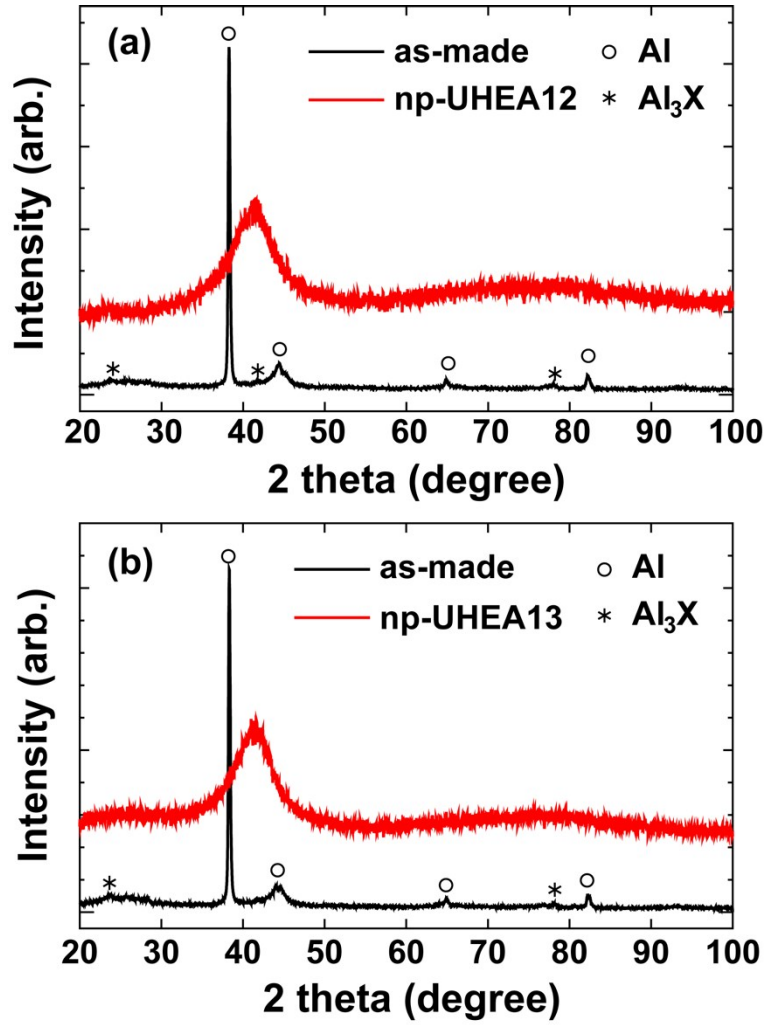

**Figure S2.** XRD patterns of (a) np-UHEA12 and as-made precursor alloy  $\text{Al}_{89}\text{Ag}_1\text{Au}_1\text{Co}_1\text{Cu}_1\text{Fe}_1\text{Ir}_1\text{Ni}_1\text{Pd}_1\text{Pt}_1\text{Rh}_1\text{Ru}_1$  quenched by melt spinning, and (b) np-UHEA13 and  $\text{Al}_{88}\text{Ag}_1\text{Au}_1\text{Co}_1\text{Cu}_1\text{Fe}_1\text{Ir}_1\text{Mo}_1\text{Ni}_1\text{Pd}_1\text{Pt}_1\text{Rh}_1\text{Ru}_1$  quenched by melt spinning.

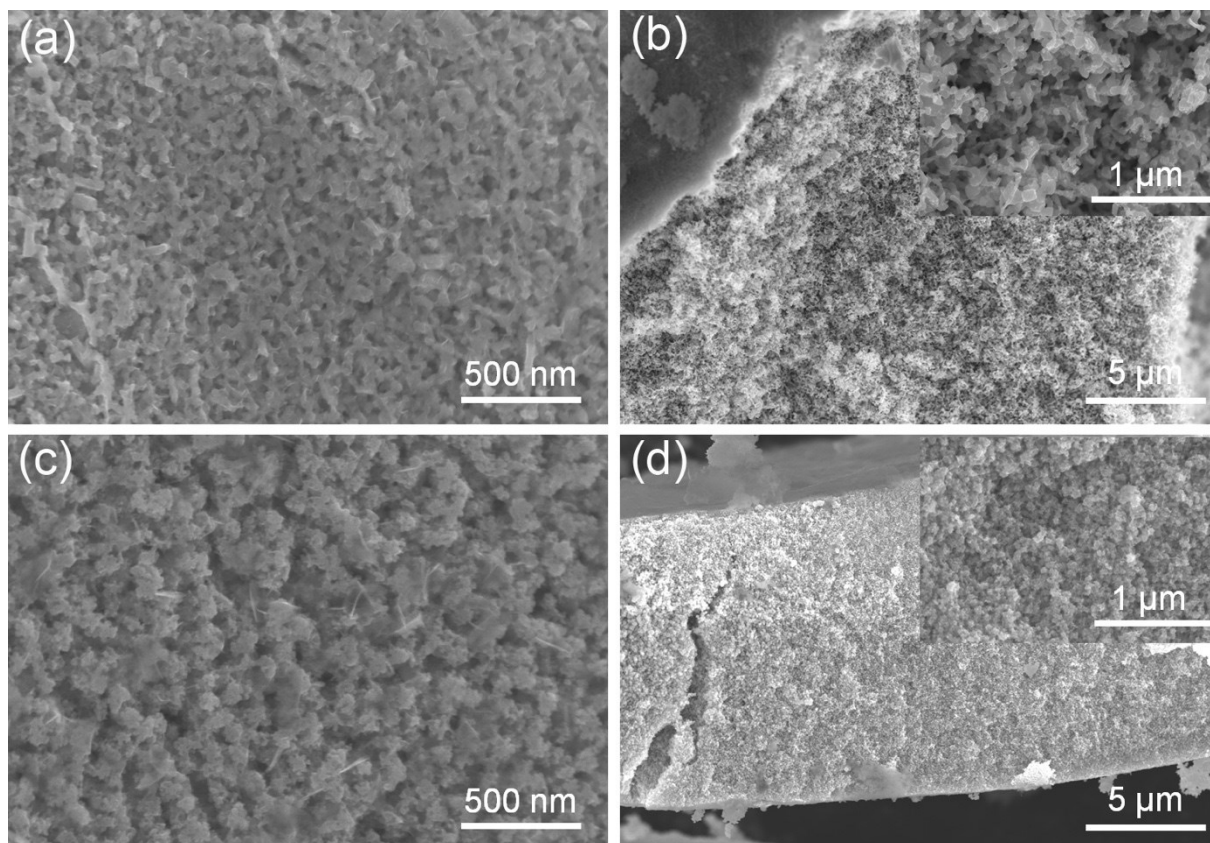

**Figure S3.** SEM images from (a, c) top-view and (b, d) cross-section regions of (a, b) np-UHEA12 and (c, d) np-UHEA13 showing the uniform nanoporous structure formed via dealloying.

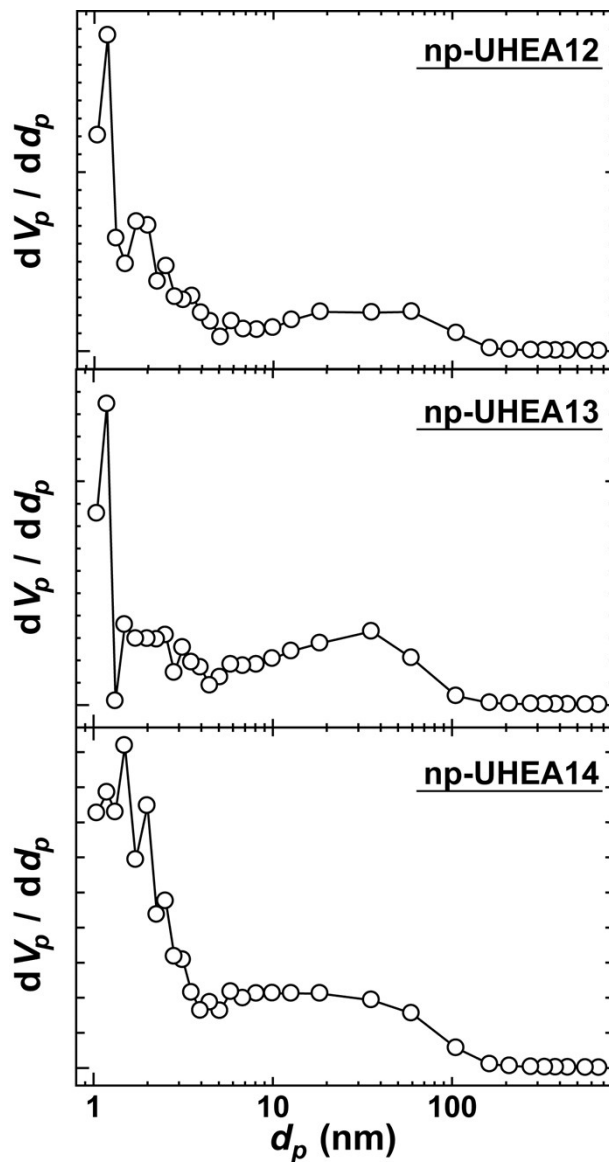

**Figure S4.** BJH pore size distributions of np-UHEA12, np-UHEA13, and np-UHEA14 showing similar hierarchical distributions with a high population of ~2–5 nm-sized particles and a broad peak for ~30–40 nm particles, consistent with the TEM observations.

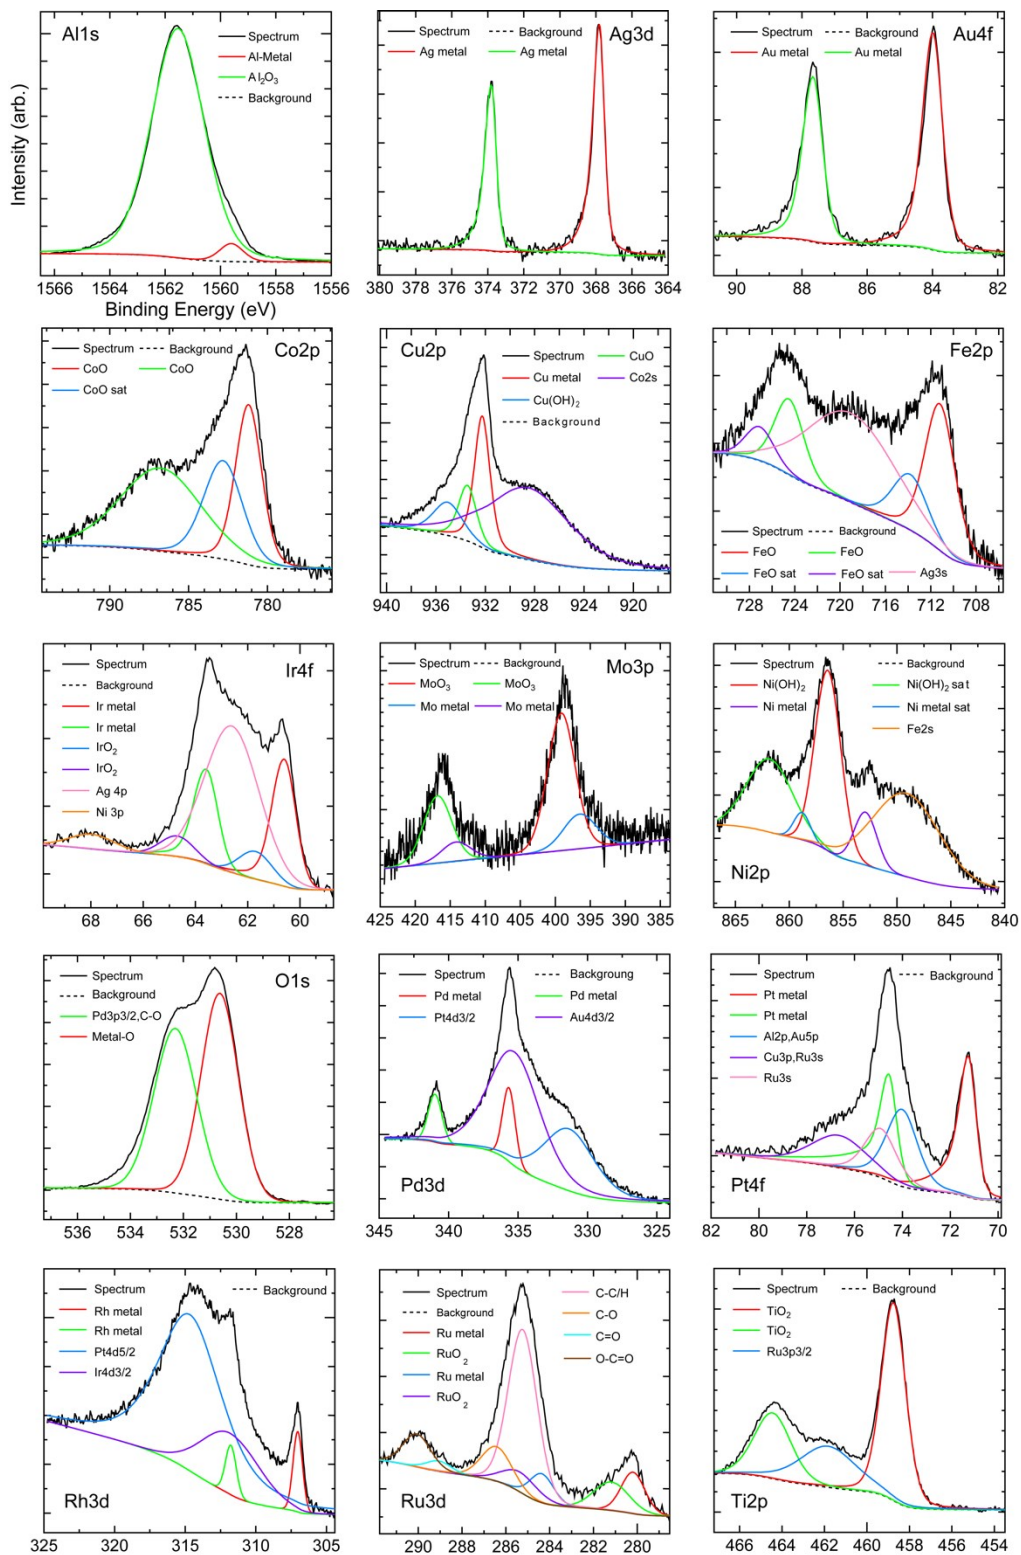

**Figure S5.** XPS spectra and deconvoluted states for each element in np-UHEA14.

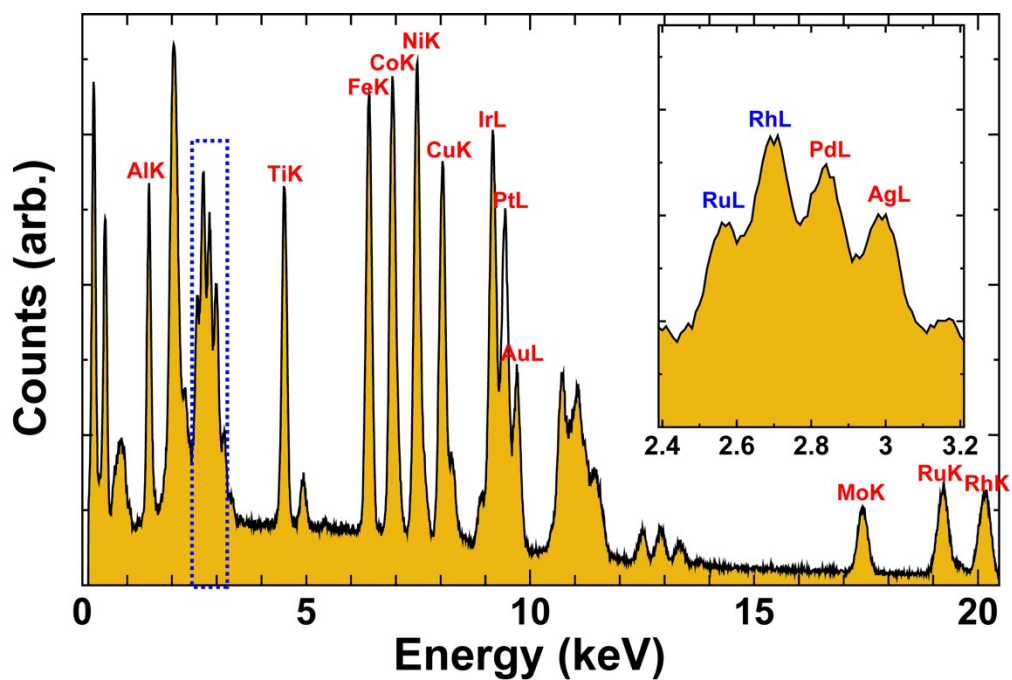

**Figure S6.** Typical EDS spectrum acquired for np-UHEA14. The selected ROI is also displayed for clarification. The 14 marked lines in red were used to display EDS mapping. A carbon-coated nylon mesh without metal elements was used to suppress the background intensities.

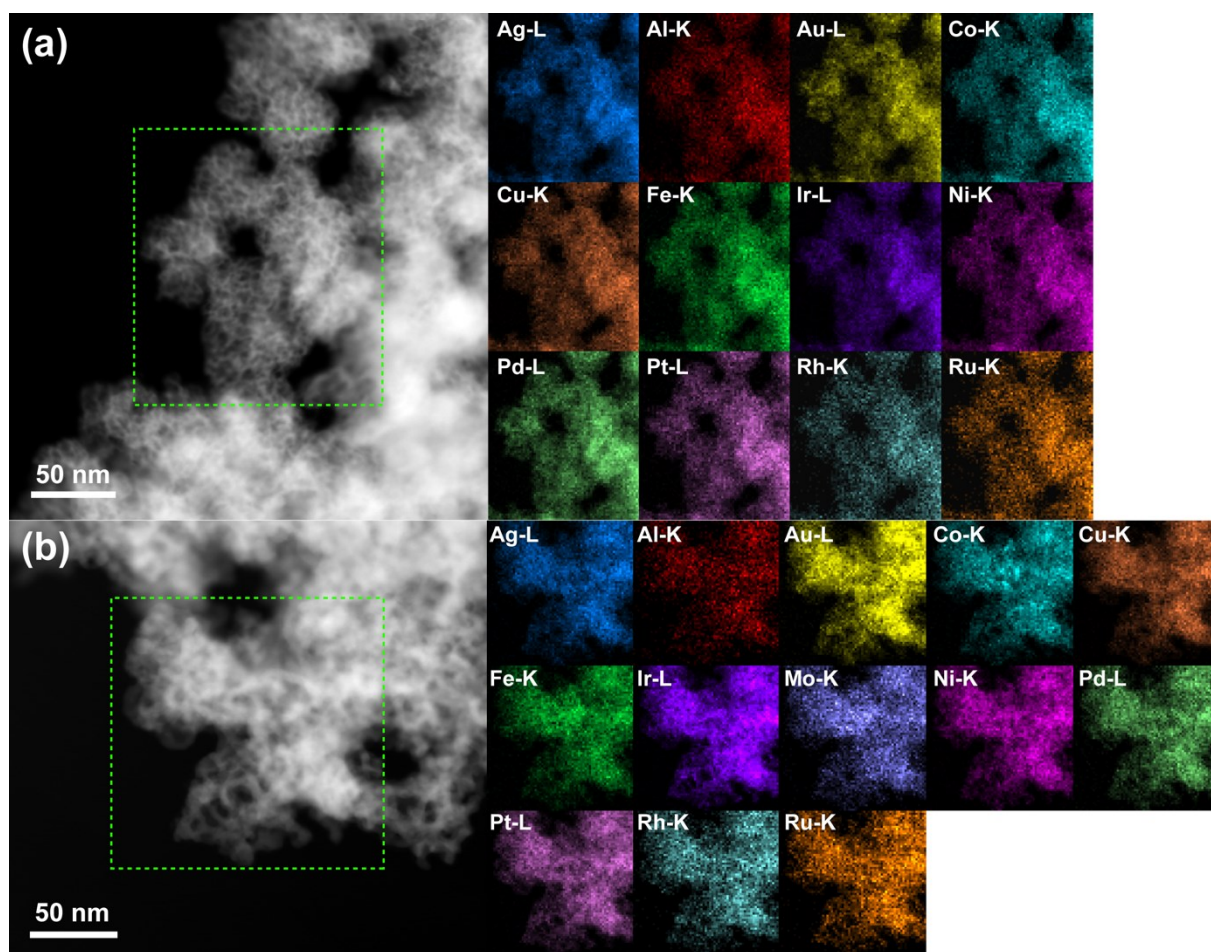

**Figure S7.** STEM-EDS mapping of (a) np-UHEA12 and (b) np-UHEA13. Selected ROIs are shown. Each element is uniformly distributed in both samples.

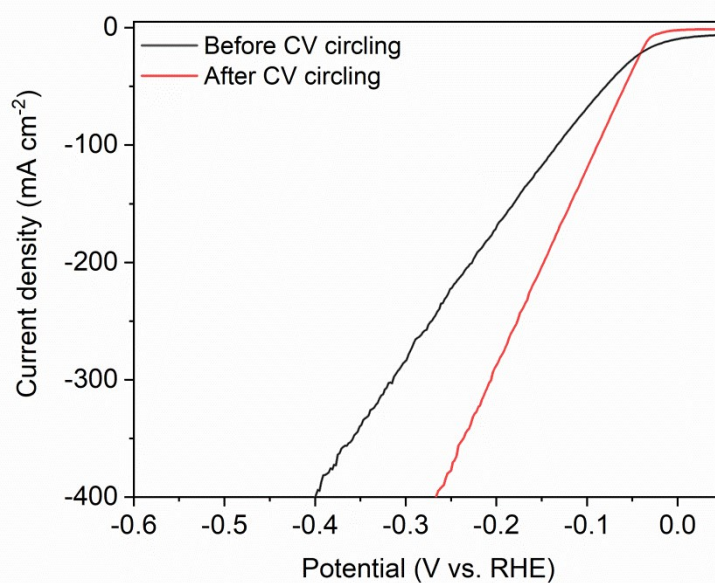

**Figure S8.** The HER properties of np-UHEA14 before and after CV circling at a sweep rate of  $100 \text{ mV s}^{-1}$  in the range of 1.1– 1.6 V vs. the reversible hydrogen electrode (RHE) in the electrolyte.

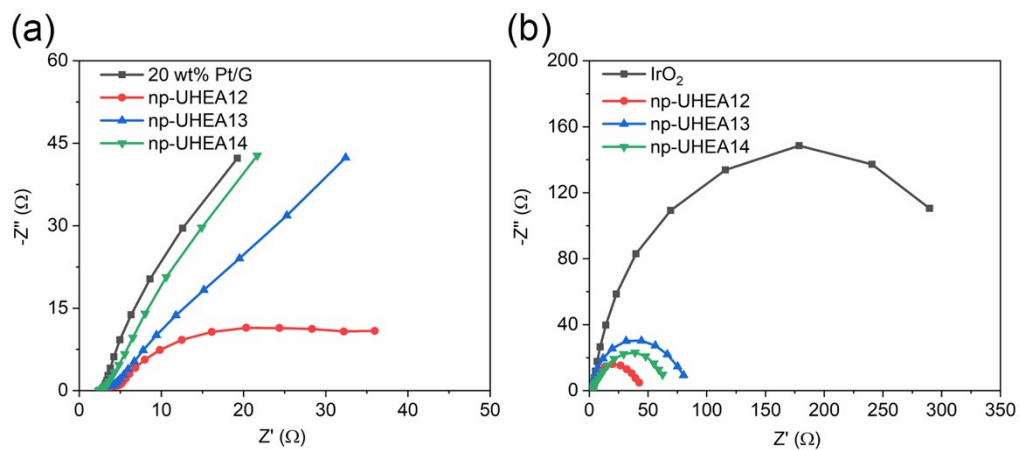

**Figure S9.** Nyquist plots of np-UHEAs, Pt/G, and IrO<sub>2</sub> collected at (a) 0.0 V vs. RHE and (b) at 1.5 V vs. RHE in 0.5 M H<sub>2</sub>SO<sub>4</sub>.



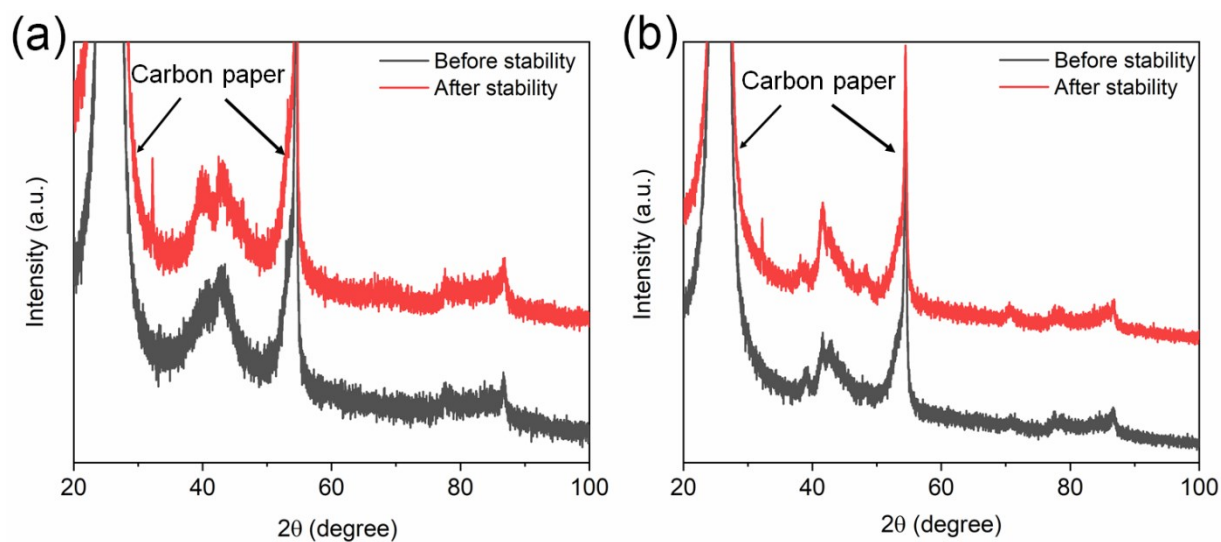

**Figure S10.** Comparison of XRD spectra of samples before and after the stability test in 0.5 M H<sub>2</sub>SO<sub>4</sub>, (a) np-UHEA-14 for HER, (b) np-UHEA-12 for OER.

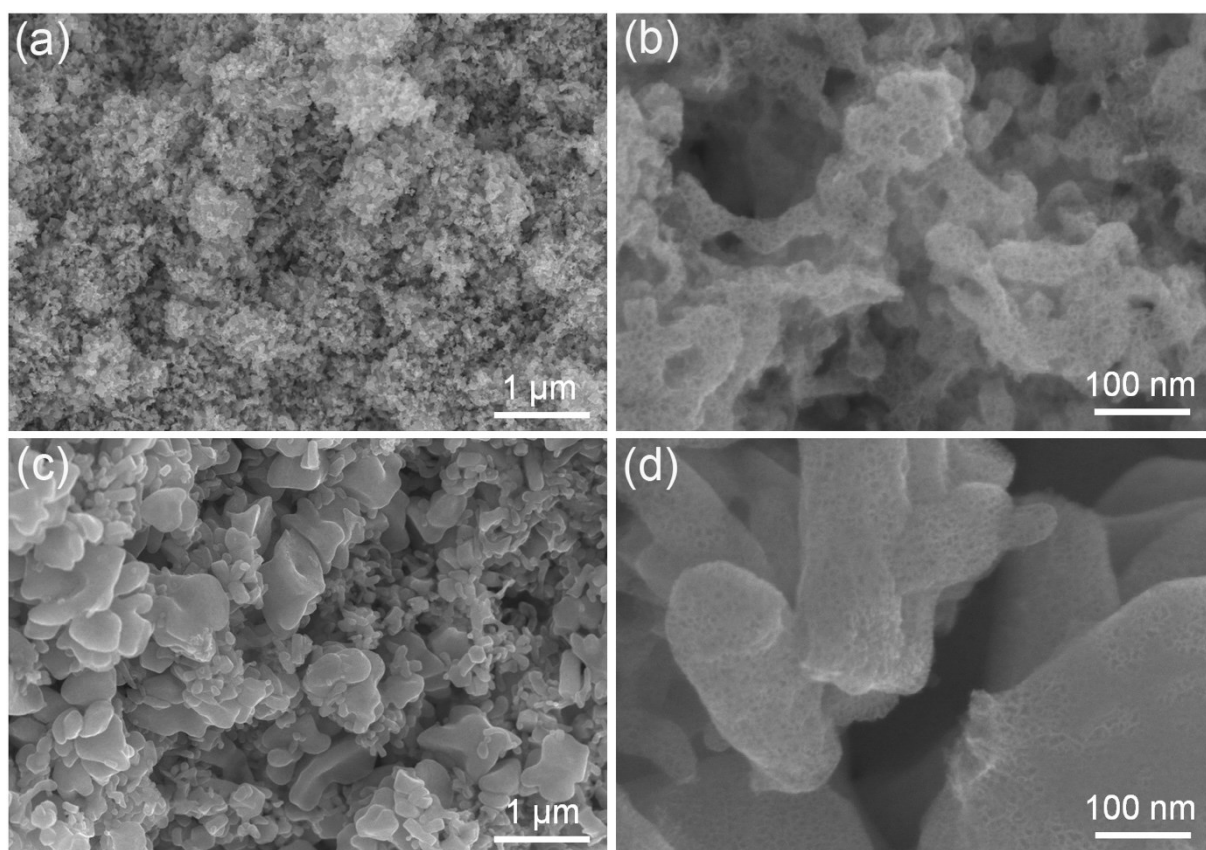

**Figure S11.** SEM images of np-UHEAs after 10 h of chronopotentiometric measurements at a current density of 10 mA cm<sup>-2</sup> in 0.5 M H<sub>2</sub>SO<sub>4</sub>. (a, b) np-UHEA14 for HER and (c, d) np-UHEA12 for OER.

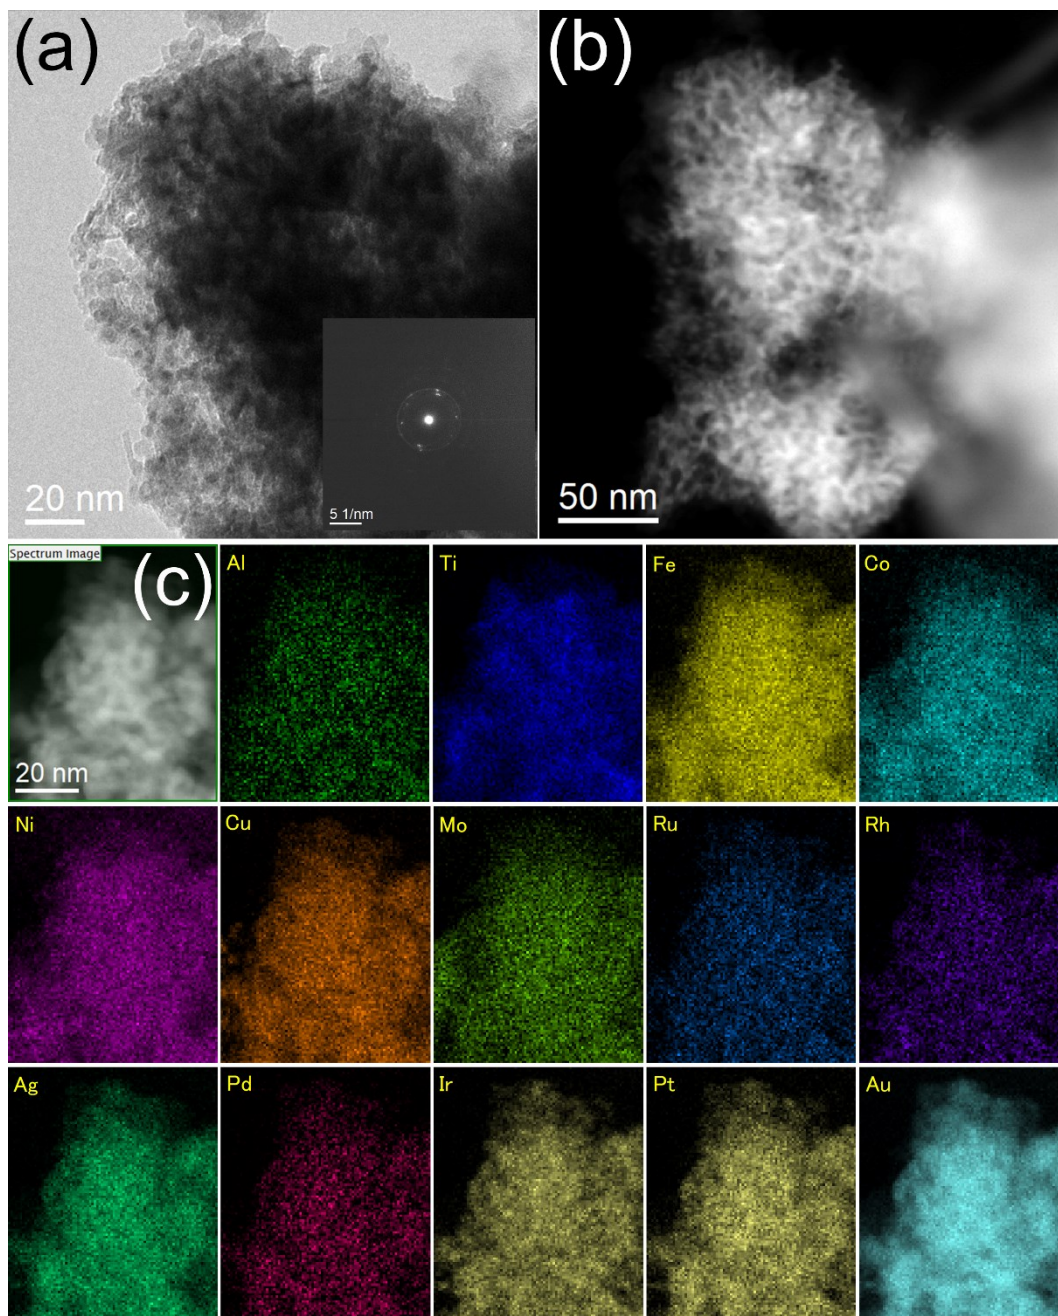

**Figure S12.** (a) TEM (inset SAED), (b) STEM, and (c) EDS mappings of np-UHEA14 after the stability test for HER in 0.5 M H<sub>2</sub>SO<sub>4</sub>. Each element remained uniformly distributed after the stability test.

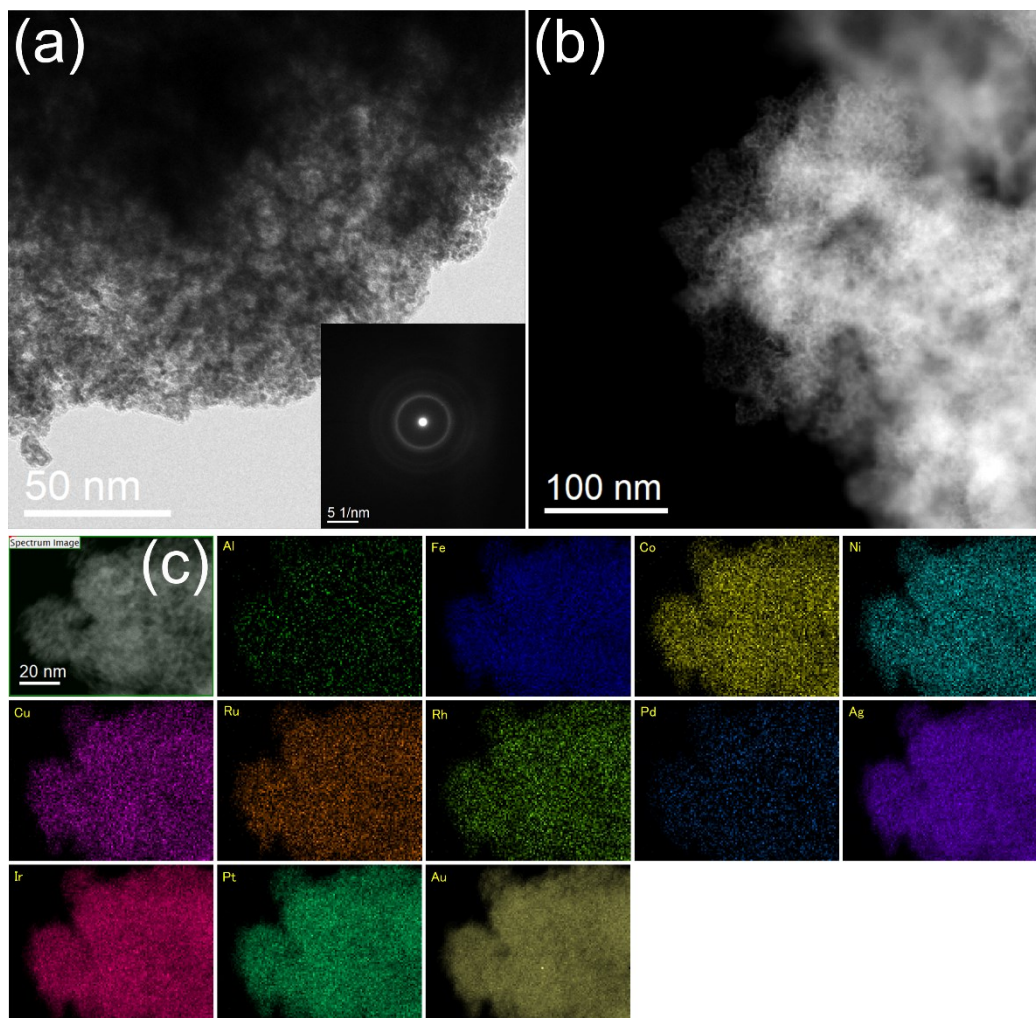

**Figure S13.** (a) TEM (inset SAED), (b) STEM, and (c) EDS mappings of np-UHEA12 after stability test for OER in 0.5 M H<sub>2</sub>SO<sub>4</sub>. Each element remained uniformly distributed after the stability test.

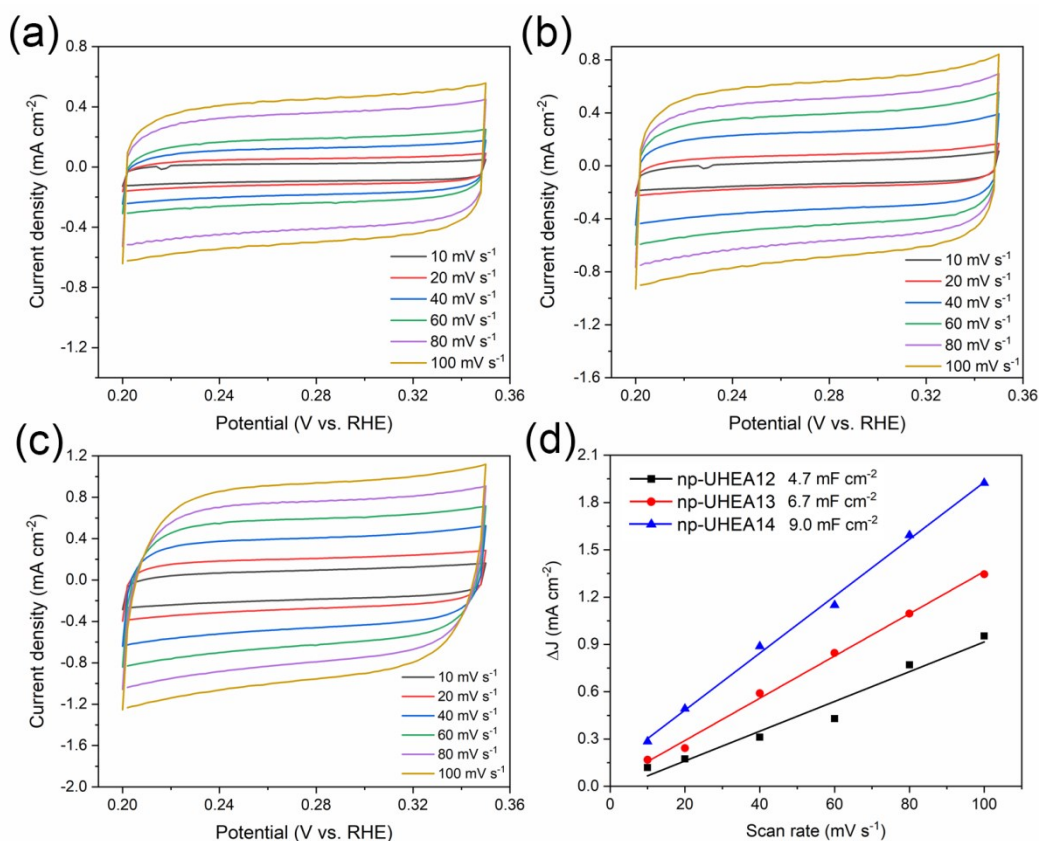

**Figure S14.** Charging currents measured in the non-faradaic potential range of 0.20–0.35 V (vs. RHE) at varying scan rates (10, 20, 40, 60, 80, and 100 mV s<sup>-1</sup>) for (a) np-UHEA12, (b) np-UHEA13, and (c) np-UHEA14. (d) Charging currents measured at 0.25 V vs. RHE plotted as a function of the scan rate. The double layer capacitance of the system is calculated from the slopes of the linear fit to the data.

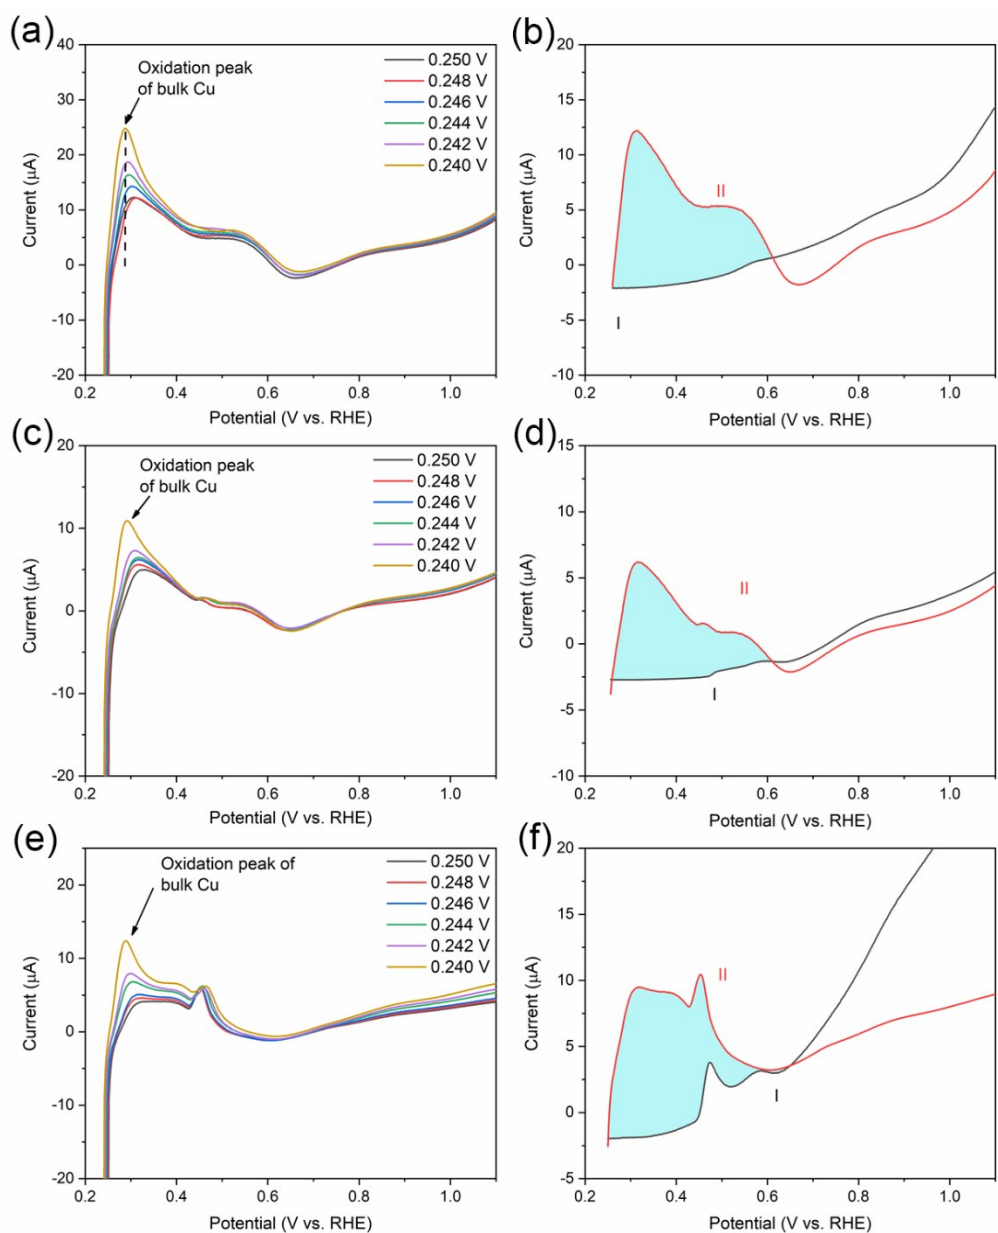

**Figure S15.** Electrochemical surface area (ECSA) measurements of np-UHEAs. Cu-UPD in 0.5 M  $\text{H}_2\text{SO}_4$  in the presence of 5 mM  $\text{CuSO}_4$  on (a) np-HEA, (c) np-UHEA13, and (e) UHEA14, the electrode was polarized at varying potentials for 100 s to form the UPD layers. Cu-UPD in 0.5 M  $\text{H}_2\text{SO}_4$  in the (I) absence and (II) presence of 5 mM  $\text{CuSO}_4$  on (b) np-UHEA12, (d) np-UHEA13, and (f) np-UHEA14 catalysts.

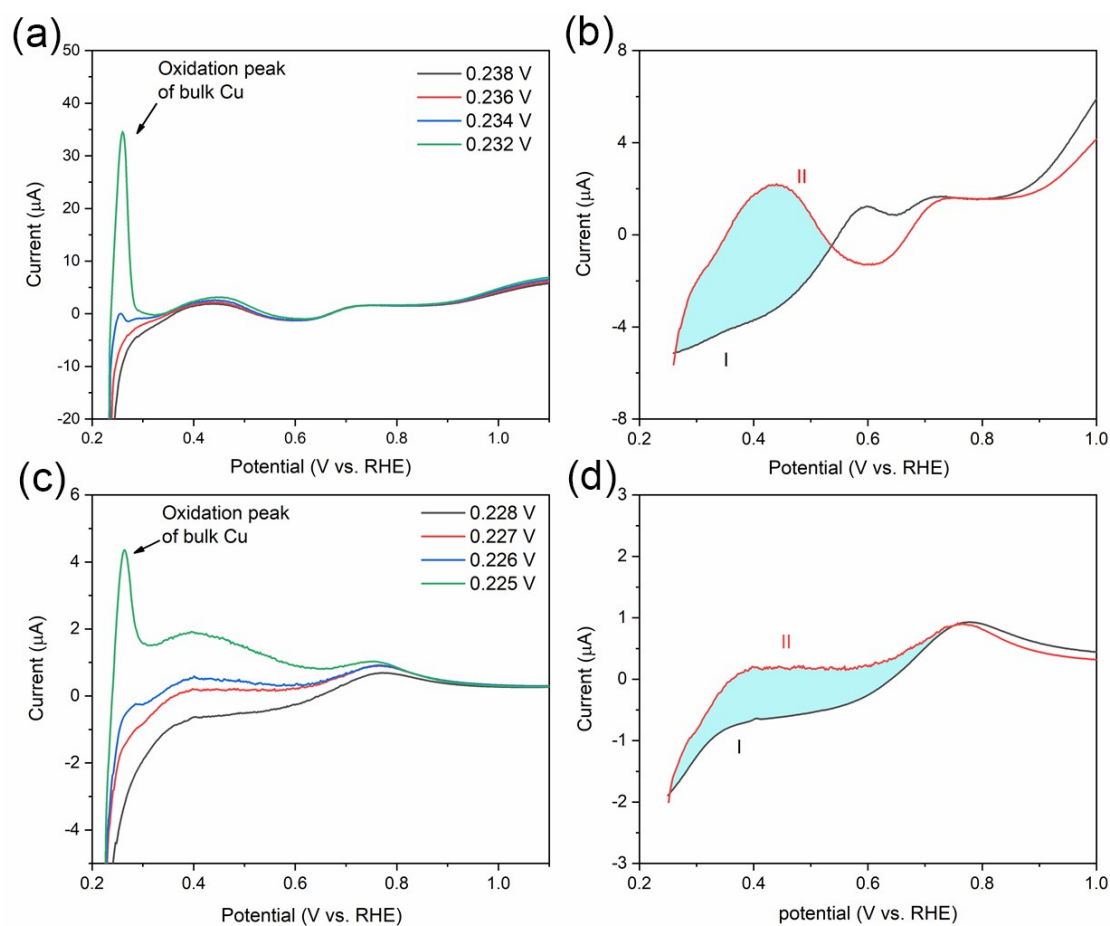

**Figure S16.** ECSA measurements of commercial Pt/G and IrO<sub>2</sub> catalysts. Cu-UPD in 0.5 M H<sub>2</sub>SO<sub>4</sub> in the presence of 5 mM CuSO<sub>4</sub> on (a) commercial Pt/G and (c) commercial IrO<sub>2</sub>. The electrode was polarized at varying potentials for 100 s to form the UPD layers. Cu-UPD in 0.5 M H<sub>2</sub>SO<sub>4</sub> in the (I) absence and (II) presence of 5 mM CuSO<sub>4</sub> on (b) commercial Pt/G and (d) commercial IrO<sub>2</sub> catalysts.

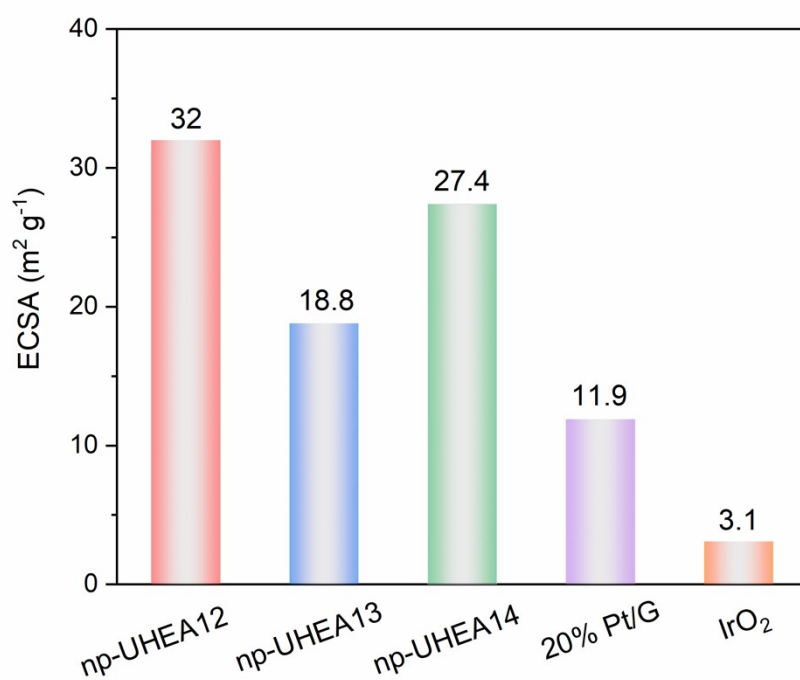

**Figure S17.** ECSAs of the catalysts measured employing the Cu-UPD method.

**Table 1.** Summary of electrocatalytic OER and HER performances of HEA-based catalysts.

| Reaction             | Catalyst name                                                                                   | Number of compositions | Electrolyte                          | Overpotential (mV @10 mA cm <sup>-2</sup> ) | Tafel slope (mV dec <sup>-1</sup> )               | Mass activity (A mg <sup>-1</sup> )                                                                 | Durability test                                               | Ref.      |
|----------------------|-------------------------------------------------------------------------------------------------|------------------------|--------------------------------------|---------------------------------------------|---------------------------------------------------|-----------------------------------------------------------------------------------------------------|---------------------------------------------------------------|-----------|
| OER                  | np-UHEA12                                                                                       | 12                     | 0.5 M H <sub>2</sub> SO <sub>4</sub> | 258                                         | 84.2                                              |                                                                                                     | 40,000 s @ 10 mA cm <sup>-2</sup>                             | This work |
|                      | np-AlNiCoIrMo                                                                                   | 5                      | 0.5 M H <sub>2</sub> SO <sub>4</sub> | 233                                         | 55.2                                              | 0.115 @1.5 V <sub>RHE</sub>                                                                         | 11.5 mV increased @ 60 mA cm <sup>-2</sup> after 7,000 cycles | S1        |
|                      | np-AlNiCoIrV                                                                                    | 5                      | 0.5 M H <sub>2</sub> SO <sub>4</sub> |                                             | 59.8                                              |                                                                                                     |                                                               | S1        |
|                      | np-MoNiCoFeAl                                                                                   | 5                      | 1.0 M KOH                            | ~240                                        | 46                                                |                                                                                                     | ~90% after 2,000 cycles, 50 h @ 10 mA cm <sup>-2</sup>        | S2        |
|                      | CoCrFeMnNi NPs                                                                                  | 5                      | 0.1 M NaOH                           |                                             | 150                                               | 0.104 @ 1.7 V <sub>RHE</sub> including carbon black                                                 |                                                               | S3        |
|                      | PtLaNiCoFe HEMG-NP                                                                              | 5                      | 0.1 M KOH                            | 377                                         | 150                                               |                                                                                                     | 1 h @ 1.6 V <sub>RHE</sub>                                    | S4        |
|                      | HEAN@NPC/CC-450                                                                                 | 5                      | 1.0 M KOH                            | 263                                         | 43                                                |                                                                                                     | 24 h @ 10 mA cm <sup>-2</sup>                                 | S5        |
|                      | Graphene-FeCoNiCuCr HEA nanocomposite                                                           | 5                      | 1.0 M KOH                            | 330                                         | 80                                                | 380 mA mg <sup>-1</sup> @ 1.75 V <sub>RHE</sub>                                                     | 7 h @ 25 mA cm <sup>-2</sup>                                  | S6        |
|                      | AlNiCoRuMo nanowires                                                                            | 5                      | 1.0 M KOH                            | 245                                         | 54.5                                              | ~300 mA mg <sup>-1</sup> <sub>Ru</sub> @ 1.5 V <sub>RHE</sub>                                       | 100 h @1.48 V <sub>RHE</sub>                                  | S7        |
| HER                  | np-UHEA14                                                                                       | 14                     | 0.5 M H <sub>2</sub> SO <sub>4</sub> | 32                                          | 30.1                                              | 2.44 A mg <sup>-1</sup> <sub>Pt</sub>                                                               | 40,000 s @ 10 mA cm <sup>-2</sup>                             | This work |
|                      | np-IrMoNiCoAl                                                                                   | 5                      | 0.5 M H <sub>2</sub> SO <sub>4</sub> | 18.5                                        | 33.2                                              |                                                                                                     | ~ 50 h @ 1.52 V <sub>RHE</sub>                                | S1        |
|                      | np-AuPtPdNiCuAl                                                                                 | 6                      | 0.5 M H <sub>2</sub> SO <sub>4</sub> |                                             | 28                                                | 6.9 @ -0.07 V <sub>RHE</sub><br>2.5 A mg <sub>Pt+Pd+Au</sub> <sup>-1</sup> @ -0.07 V <sub>RHE</sub> | ~ 100% after 2,000 cycles                                     | S8        |
|                      | MoNiCoFeCr-1150                                                                                 | 5                      | 0.5 M H <sub>2</sub> SO <sub>4</sub> | 107                                         | 41                                                |                                                                                                     | 8 h @ 100 mA cm <sup>-2</sup>                                 | S9        |
|                      |                                                                                                 |                        | 1.0 M KOH                            | 172                                         | 66                                                |                                                                                                     |                                                               |           |
|                      | Al <sub>80</sub> Ni <sub>6</sub> Co <sub>3</sub> Mn <sub>3</sub> Y <sub>5</sub> Au <sub>3</sub> | 6                      | 0.5 M H <sub>2</sub> SO <sub>4</sub> | 70                                          | 39                                                |                                                                                                     | 20 h @10 mA cm <sup>-2</sup>                                  | S10       |
|                      | AuPtPdRhRu NPs/C-700 °C                                                                         | 5                      | 1.0 M KOH                            | 190 @ 30 mA cm <sup>-2</sup>                | 62                                                |                                                                                                     | 8 h @ 100 mA cm <sup>-2</sup>                                 | S11       |
|                      | PdFeCoNiCu/C                                                                                    | 5                      | 1.0 M KOH                            | 18                                          | 39                                                | 6.51 A mg <sub>Pd</sub> <sup>-1</sup> @ -0.07 V <sub>RHE</sub>                                      | 15 days @ 18 mV                                               | S12       |
|                      | FeCoPdIrPt@GO HEA-NPs                                                                           | 5                      | 1.0 M KOH                            | 42                                          | 82                                                | 9.1 mA μg <sub>Pt</sub> @ 100 mV <sub>RHE</sub>                                                     | 150 h @ 10 mA cm <sup>-2</sup>                                | S13       |
|                      | Pt <sub>18</sub> Ni <sub>26</sub> Fe <sub>15</sub> Co <sub>14</sub> Cu <sub>27</sub> /C         | 5                      | 1.0 M KOH                            | 11                                          | 30                                                | 10.96 A mg <sup>-1</sup> <sub>Pt</sub> @ -0.07 V <sub>RHE</sub>                                     | ~ 100% after 10,000 cycles                                    | S14       |
| AlNiCoRuMo nanowires | 5                                                                                               | 1.0 M KOH              | 24.5                                 | 30.3                                        | ~230 mA mg <sup>-1</sup> <sub>Ru</sub> @ -0.025 V | 100 h @ -0.025 V <sub>RHE</sub>                                                                     | S7                                                            |           |



|                       |   |           |      |      |  |                                   |     |
|-----------------------|---|-----------|------|------|--|-----------------------------------|-----|
| IrPdPtRhRu HEA<br>NPs | 5 | 1.0 M KOH | 17   |      |  | ~ 100% after<br>3,000 cycles      | S15 |
| FeCoNiAlTi HEI        | 5 | 1.0 M KOH | 88.2 | 40.1 |  | 40 h @ 100<br>mA cm <sup>-2</sup> | S16 |

---

**Table S2.** Comparison of the performances of bifunctional electrocatalysts for overall water splitting in acidic environments.

| Catalysts                                           | Electrolytes                         | HER $\eta$ (mV @ 10 mA cm <sup>-2</sup> ) | OER $\eta$ (mV @ 10 mA cm <sup>-2</sup> ) | Overall water splitting cell voltage (V@ 10 mA cm <sup>-2</sup> ) | Durability test of water splitting. | Ref.      |
|-----------------------------------------------------|--------------------------------------|-------------------------------------------|-------------------------------------------|-------------------------------------------------------------------|-------------------------------------|-----------|
| More than 12 elements np-UHEAs                      | 0.5 M H <sub>2</sub> SO <sub>4</sub> | 32 (np-UHEA14)                            | 258 (np-UHEA12)                           | 1.522                                                             | 40,000 s @ 10 mA cm <sup>-2</sup>   | This work |
| np-AlNiCoIrMo                                       | 0.5 M H <sub>2</sub> SO <sub>4</sub> | 18.5                                      | 233                                       | 1.48                                                              | 48 h @ 1.52 V                       | [S1]      |
| Ir-SA@Fe@NCNT                                       | 0.5 M H <sub>2</sub> SO <sub>4</sub> | 26                                        | 250                                       | 1.51                                                              | 12 h @ 1.51 V                       | [S17]     |
| M-doped RuO <sub>2</sub> NWs (M = Co, Ni, Fe)       | 0.5 M H <sub>2</sub> SO <sub>4</sub> | 78 (Ni-doped RuO <sub>2</sub> NWs)        | 200 (Ni-doped RuO <sub>2</sub> NWs)       | 1.537                                                             | 12 h @ 1.537 V                      | [S18]     |
| IrCoNi PHNCs                                        | 0.5 M H <sub>2</sub> SO <sub>4</sub> | 68                                        | 309                                       | 1.6 @4.66 mA cm <sup>-2</sup>                                     | 1000 CV circles                     | [S19]     |
| Ir <sub>6</sub> Ag <sub>9</sub> NTs                 | 0.5 M H <sub>2</sub> SO <sub>4</sub> | 20                                        | 285                                       | 1.55                                                              | 1000 CV cycles                      | [S20]     |
| IrNi <sub>0.57</sub> Fe <sub>0.82</sub> NPs         | 0.5 M HClO <sub>4</sub>              | 24                                        | 284                                       | 1.64                                                              | 20000 s @ 10 mA cm <sup>-2</sup>    | [S21]     |
| Ir/GF                                               | 0.5 M H <sub>2</sub> SO <sub>4</sub> | 7                                         | 290                                       | 1.55                                                              | 10 h @ 10 mA cm <sup>-2</sup>       | [S22]     |
| IrCoNi PHNCs                                        | 0.5 M H <sub>2</sub> SO <sub>4</sub> | 68                                        | 309                                       | 1.56 @2 mA cm <sup>-2</sup>                                       | 1000 CV cycles                      | [S23]     |
| RuCu NSs/C                                          | 0.5 M H <sub>2</sub> SO <sub>4</sub> | 19                                        | 236                                       | 1.49                                                              | 14 h @ 5 mA cm <sup>-2</sup>        | [S24]     |
| Li-IrSe <sub>2</sub>                                | 0.5 M H <sub>2</sub> SO <sub>4</sub> | 55                                        | 220                                       | 1.44                                                              | 24 h @ 20 mA cm <sup>-2</sup>       | [S25]     |
| IrNi NFs                                            | 0.5 M H <sub>2</sub> SO <sub>4</sub> | 40                                        | 330                                       | 1.6                                                               | 1,000 CV cycles                     | [S26]     |
| Ru-SA/Ti <sub>3</sub> C <sub>2</sub> T <sub>x</sub> | 0.1 M HClO <sub>4</sub>              | 70                                        | 290                                       | 1.56                                                              | 32 h @ 10 mA cm <sup>-2</sup>       | [S27]     |
| Co-RuIr                                             | 0.1 M HClO <sub>4</sub>              | 24                                        | 235                                       | 1.52                                                              | 24 h @ 10 mA cm <sup>-2</sup>       | [S28]     |
| IrCo <sub>0.65</sub> NDs                            | 0.1 M HClO <sub>4</sub>              | 17                                        | 281                                       | 1.593                                                             | 20,000 s @ 10 mA cm <sup>-2</sup>   | [S29]     |
| PdCu/Ir/C                                           | 0.5 M H <sub>2</sub> SO <sub>4</sub> | 21                                        | 344                                       | 1.583                                                             | 2,000 CV cycles                     | [S30]     |

### Comment on nominal composition of np-UHEAs

Acquiring the nominal composition of the np-UHEAs via ICP analysis was challenging because the samples were not completely soluble, even in aqua regia, and some substances remained undissolved as alloys or oxides. Here, we list the weight fractions of the measured elements without the unavailable elements Ag, Ir, Rh, and Ru, as is. We acknowledge that the sum of all weight percentages is not 100%. Although we cannot exclude the possibility that undetected volume among measured elements may exist as unsolved substances in aqua regia, the values of weight percent/atomic weight, except for Al, were found to be largely equal.

Therefore, we assumed the nominal composition of np-UHEAs as follows:

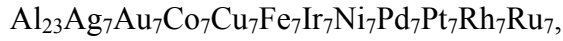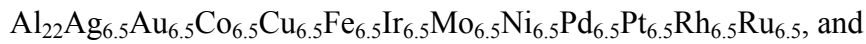

$\text{Al}_{20.7}\text{Ag}_{6.1}\text{Au}_{6.1}\text{Co}_{6.1}\text{Cu}_{6.1}\text{Fe}_{6.1}\text{Ir}_{6.1}\text{Mo}_{6.1}\text{Ni}_{6.1}\text{Pd}_{6.1}\text{Pt}_{6.1}\text{Rh}_{6.1}\text{Ru}_{6.1}\text{Ti}_{6.1}$  (%) for np-UHEA12, np-UHEA13, and np-UHEA14, respectively. The corresponding mixed configuration entropies  $S = -R \sum x_i \ln(x_i)$  were 2.39, 2.47, and 2.54, respectively.

**Table S3.** ICP analysis of np-UHEA12.

| Element | Weight percent | Weight percent/<br>atomic weight |
|---------|----------------|----------------------------------|
| Al      | 5.6            | 0.237591                         |
| Au      | 11.6           | 0.067416                         |
| Cu      | 3.8            | 0.068457                         |
| Co      | 3.6            | 0.069928                         |
| Fe      | 3.4            | 0.069697                         |
| Ni      | 3.4            | 0.066313                         |
| Pd      | 6.3            | 0.067764                         |
| Pt      | 11.9           | 0.069825                         |

**Table S4.** ICP analysis of np-UHEA13.

| Element | Weight percent | Weight percent/<br>atomic weight |
|---------|----------------|----------------------------------|
| Al      | 5.9            | 0.218681                         |
| Au      | 11.3           | 0.057372                         |
| Cu      | 3.7            | 0.058231                         |
| Co      | 3.3            | 0.055999                         |
| Fe      | 3.1            | 0.055516                         |
| Mo      | 2.6            | 0.027095                         |
| Ni      | 3.4            | 0.057932                         |
| Pd      | 6.1            | 0.05732                          |
| Pt      | 11.2           | 0.057411                         |

**Table S5.** ICP analysis of np-UHEA14.

| Element | Weight percent | Weight percent/<br>atomic weight |
|---------|----------------|----------------------------------|
| Al      | 4.9            | 0.181616                         |
| Au      | 10.3           | 0.052295                         |
| Cu      | 3.4            | 0.05351                          |
| Co      | 3              | 0.050908                         |
| Fe      | 2.6            | 0.046562                         |
| Mo      | 3.8            | 0.0396                           |
| Ni      | 3              | 0.051116                         |
| Pd      | 5.6            | 0.052622                         |
| Pt      | 9.8            | 0.050235                         |
| Ti      | 2.5            | 0.052228                         |

## References

- [S1] Z. Jin, J. Lv, H. Jia, W. Liu, H. Li, Z. Chen, X. Lin, G. Xie, X. Liu, S. Sun, H. J. Qiu, *Small* **2019**, *15*, 1904180.
- [S2] H.-J. Qiu, G. Fang, J. Gao, Y. Wen, J. Lv, H. Li, G. Xie, X. Liu, S. Sun, *ACS Mater. Lett.* **2019**, *1*, 526.
- [S3] F. Waag, Y. Li, A. R. Ziefuß, E. Bertin, M. Kamp, V. Duppel, G. Marzun, L. Kienle, S. Barcikowski, B. Gökce, *RSC Adv.* **2019**, *9*, 18547.
- [S4] M. W. Glasscott, A. D. Pendergast, S. Goines, A. R. Bishop, A. T. Hoang, C. Renault, J. E. Dick, *Nat. Commun.* **2019**, *10*, 2650.

- [S5] K. Huang, B. Zhang, J. Wu, T. Zhang, D. Peng, X. Cao, Z. Zhang, Z. Li, Y. Z. Huang, *J. Mater. Chem. A* **2020**, *8*, 11938.
- [S6] R. Nandan, M. Y. Rekha, H. R. Devi, C. Srivastavab, K. K. Nanda, *Chem Commun.* **2021**, DOI: 10.1039/d0cc06485h.
- [S7] Z. Jin, J. Lyu, Y.-L. Zhao, H. Li, X. Lin, G. Xie, X. Liu, J.-J. Kai, H.-J. Qiu, *ACS Mater. Lett.* **2020**, *2*, 1698.
- [S8] H. J. Qiu, G. Fang, Y. Wen, P. Liu, G. Xie, X. Liu, S. Sun, *J. Mater. Chem. A* **2019**, *7*, 6499.
- [S9] G. Zhang, K. Ming, J. Kang, Q. Huang, Z. Zhang, X. Zheng, X. Bi, *Electrochim. Acta* **2018**, *279*, 19.
- [S10] S. Ju, J. Feng, P. Zou, W. Xu, J. Huo, S. Wang, W. Gao, H. Qiu, J. Wang, *J. Mater. Chem. A* **2020**, *8*, 3246.
- [S11] M. Liu, Z. Zhang, F. Okejiri, S. Yang, S. Zhou, S. Dai, *Adv. Mater. Interfaces* **2019**, *6*, 1900015.
- [S12] D. Zhang, Y. Shi, H. Zhao, W. Qi, X. Chen, T. Zhan, S. Li, B. Yang, M. Sun, J. Lai, B. Huang, L. Wang, *J. Mater. Chem. A* **2021**, DOI: 10.1039/D0TA10574K.
- [S13] S. Gao, S. Hao, Z. Huang, Y. Yuan, S. Han, L. Lei, X. Zhang, R. Shahbazian-Yassar, J. Lu, *Nat. Commun.* **2020**, *11*, 2016.
- [S14] H. Li, Y. Han, H. Zhao, W. Qi, D. Zhang, Y. Yu, W. Cai, S. Li, J. Lai, B. Huang, L. Wang, *Nat. Commun.* **2020**, *11*, 5437.
- [S15] D. Wu, K. Kusada, T. Yamamoto, T. Toriyama, S. Matsumura, I. Gueye, O. Seo, J. Kim, S. Hiroi, O. Sakata, S. Kawaguchi, Y. Kubotag, H. Kitagawa, *Chem. Sci.* **2020**, *11*, 12731.
- [S16] Z. Jia, T. Yang, L. Sun, Y. Zhao, W. Li, J. Luan, F. Lyu, L.-C. Zhang, J. J. Kruzic, J.-J. Kai, J. C. Huang, J. Lu, C. T. Liu, *Adv. Mater.* **2020**, *32*, 2000385.

- [S17] F. Luo, H. Hu, X. Zhao, Z. Yang, Q. Zhang, J. Xu, T. Kaneko, Y. Yoshida, C. Zhu, W. Cai, *Nano Lett.* **2020**, *20*, 2120.
- [S18] J. Wang, Y. Ji, R. Yin, Y. Li, Q. Shao, X. Huang, *J. Mater. Chem. A* **2019**, *7*, 6411.
- [S19] J. Feng, F. Lv, W. Zhang, P. Li, K. Wang, C. Yang, B. Wang, Y. Yang, Ji. Zhou, F. Lin, G. - C. Wang, S. Guo, *Adv. Mater.* **2017**, *29*, 1703798.
- [S20] M. Zhu, Q. Shao, Y. Qian, X. Huang, *Nano Energy* **2019**, *56*, 330.
- [S21] L. Fu, G. Cheng, W. Luo, *J. Mater. Chem. A* **2017**, *5*, 24836.
- [S22] J. Zhang, G. Wang, Z. Liao, P. Zhang, F. Wang, X. Zhuang, E. Zschech, X. Feng, *Nano Energy* **2017**, *40*, 27–3328.
- [S23] J. Feng, F. Lv, W. Zhang, P. Li, K. Wang, C. Yang, B. Wang, Y. Yang, J. Zhou, F. Lin, G. - C. Wang, S. Guo, *Adv. Mater.* **2017**, *29*, 1703798.
- [S24] Q. Yao, B. Huang, N. Zhang, M. Sun, Q. Shao, X. Huang, *Angew. Chem. Int. Ed.* **2019**, *58*, 13983.
- [S25] T. Zheng, C. Shang, Z. He, X. Wang, C. Cao, H. Li, R. Si, B. Pan, S. Zhou, J. Zeng, *Angew. Chem. Int. Ed.* **2019**, *131*, 14906.
- [S26] F. Lv, W. Zhang, W. Yang, J. Feng, K. Wang, J. Zhou, P. Zhou, S. Guo, *Small Methods* **2020**, *4*, 1900129.
- [S27] X. Peng, S. Zhao, Y. Mi, L. Han, X. Liu, D. Qi, J. Sun, Y. Liu, H. Bao, L. Zhuo, H. L. Xin, J. Luo, X. Sun, *Small* **2020**, *16*, 2002888.
- [S28] J. Shan, T. Ling, K. Davey, Y. Zheng, S. - Z. Qiao, *Adv. Mater.* **2019**, *31*, 1900510.
- [S29] L. Fu, X. Zeng, G. Cheng, W. Luo, *ACS Appl. Mater. Interfaces* **2018**, *10*, 24993.
- [S30] M. Li, Z. Zhao, Z. Xia, M. Luo, Q. Zhang, Y. Qin, L. Tao, K. Yin, Y. Chao, L. Gu, W. Yang, Y. Yu, G. Lu, S. Guo, *Angew. Chem. Int. Ed.* DOI: 10.1002/anie.202016199.
